# Supplementary material for: Cell membrane based biomimetic nanocomposites for targeted therapy of drug resistant EGFR-mutated lung cancer
Source: Royal Society of Chemistry journal article supplement (doi:10.1039/c9nr05791a), 2019-01-01
Supplement: c9nr05791a1.pdf [file c9nr05791a1.pdf]

**Supporting information:**

**Cell membrane based biomimetic nanocomposites for targeted  
therapy of drug resistant EGFR-mutated lung cancer**

Pengying Wu,<sup>a,b</sup> Dongtao Yin,<sup>c,d</sup> Jiaming Liu,<sup>a</sup> Huige Zhou,<sup>a</sup> Mengyu Guo,<sup>a</sup> Jing  
Liu,<sup>a,e</sup> Yang Liu,<sup>c</sup> Xiaobing Wang,<sup>b,\*</sup> Ying Liu,<sup>a,\*</sup> Chunying Chen<sup>a,\*</sup>

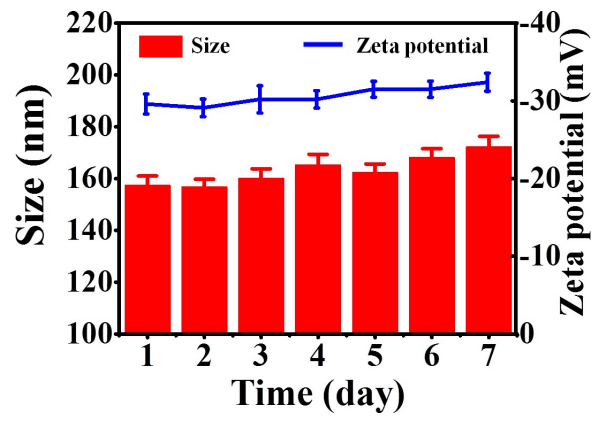

Fig. S1 The stability of the MDI storage in phosphate-buffered saline (PBS, pH 7.4) (n = 3).

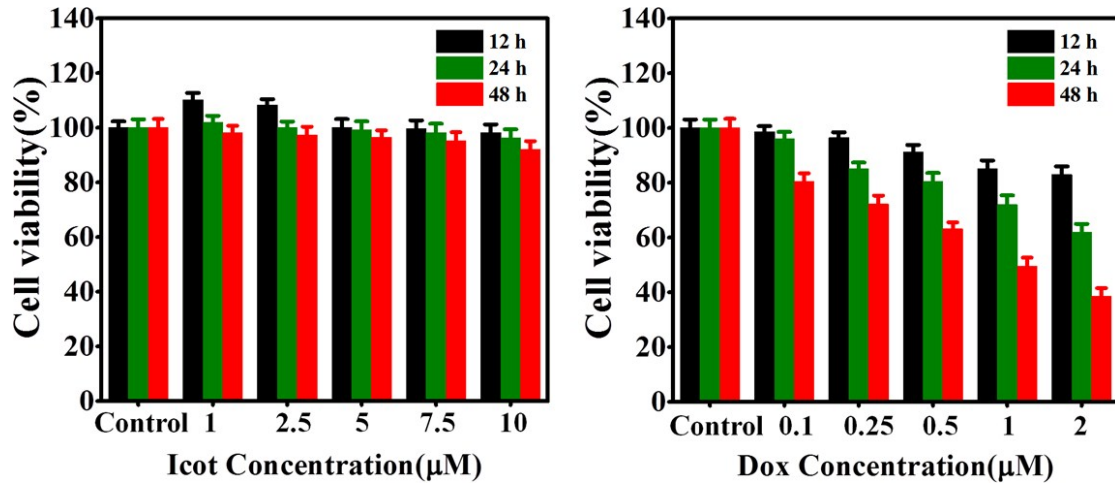

Fig. S2 The effect of free Dox and Icotinib on proliferation of H1975 cells determined by CCK-8.
